# Supplementary figures and images for: A quantitative model of amphetamine action on the 5-HT transporter
Source: PubMed Central journal article supplement — Br J Pharmacol. 2014 Jan 24;171(4):1007–18. doi: 10.1111/bph.12520 (PMC3925039; doi:10.1111/bph.12520), 2014-01-24

□ 100  $\mu$ M D-Amphetamine

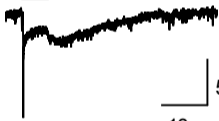

5 pA  
10 s

Supplement: bph0171-1007-sd1.pdf [file bph0171-1007-sd1.pdf]
